# Supplementary material for: Serum Copper Concentrations, Effect Modifiers and Blood Pressure: Insights from NHANES 2011–2014
Source: MDPI journal article supplement (doi:10.3390/jcdd10100432), 2023-10-18
Supplement: s1 [file s1]

## Supplementary Contents

Figure S1. Serum copper distributions.

Table S1. Sensitivity analysis for the associations of serum copper concentrations with hypertension.

Table S2. Hypertensive patients' serum copper concentrations in different subgroups.

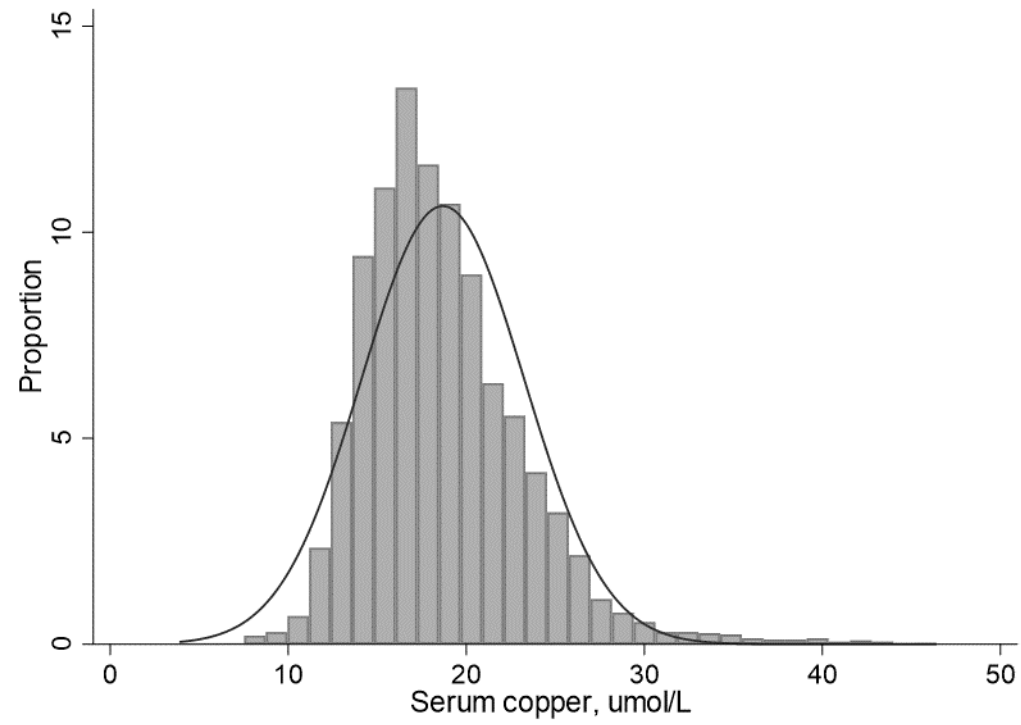

**Figure S1.** Serum copper distributions

**Table S1.** Sensitivity analysis for the associations of serum copper concentrations with hypertension.

| Outcomes                                                            | Categorical models |                       |                    |                       |                    | Continuous models  |                 |
|---------------------------------------------------------------------|--------------------|-----------------------|--------------------|-----------------------|--------------------|--------------------|-----------------|
|                                                                     | Q1                 | Q2                    | Q3                 | Q4                    | <i>P</i> for trend | 1SD increase       | <i>P</i> -value |
| Excluding participants with eGFR<60 mL/min/1.73m <sup>2</sup>       |                    |                       |                    |                       |                    |                    |                 |
| Untreated Hypertension                                              | 1.00 (ref)         | 1.05 (0.75–1.47)      | 1.17 (0.83–1.66)   | 1.10 (0.75–1.63)      | 0.515              | 1.04 (0.91–1.20)   | 0.557           |
| Treated Hypertension                                                | 1.00 (ref)         | 1.31 (0.92–1.89)      | 1.42 (0.99–2.05)   | 1.76 (1.19–2.60)      | 0.006              | 1.20 (1.05–1.38)   | 0.008           |
| Treated Hypertension <sup>a</sup>                                   | 1.00 (ref)         | 1.42 (0.86–2.32)      | 1.33 (0.81–2.17)   | 1.69 (0.99–2.88)      | 0.092              | 1.16 (0.95–1.42)   | 0.154           |
| SBP                                                                 | 1.00 (ref)         | –0.67 (–1.84–0.50)    | 0.26 (–1.01–1.53)  | –0.19 (–1.57–1.20)    | 0.879              | 0.18 (–0.30–0.65)  | 0.466           |
| DBP                                                                 | 1.00 (ref)         | –1.81 (–3.03–(–0.59)) | –1.23 (–2.55–0.09) | –1.48 (–2.92–(–0.03)) | 0.088              | –0.15 (–0.65–0.34) | 0.542           |
| Excluding outliers (beyond the range of 1%–99%) of the serum copper |                    |                       |                    |                       |                    |                    |                 |
| Untreated Hypertension                                              | 1.00 (ref)         | 1.01 (0.72–1.41)      | 1.21 (0.87–1.70)   | 1.07 (0.73–1.56)      | 0.515              | 1.03 (0.88–1.20)   | 0.695           |
| Treated Hypertension                                                | 1.00 (ref)         | 1.35 (0.97–1.88)      | 1.48 (1.06–2.06)   | 1.82 (1.28–2.60)      | 0.001              | 1.25 (1.07–1.46)   | 0.004           |
| Treated Hypertension <sup>a</sup>                                   | 1.00 (ref)         | 1.41 (0.91–2.19)      | 1.41 (0.90–2.19)   | 1.59 (1.00–2.53)      | 0.083              | 1.16 (0.93–1.43)   | 0.186           |
| SBP                                                                 | 1.00 (ref)         | –0.97 (–2.13–0.19)    | –0.13 (–1.39–1.13) | –0.77 (–2.15–0.61)    | 0.506              | –0.15 (–0.70–0.41) | 0.604           |
| DBP                                                                 | 1.00 (ref)         | –1.51 (–2.73–(0.30))  | –1.05 (–2.37–0.27) | –1.52 (–2.96–(–0.07)) | 0.077              | –0.44 (–1.03–0.14) | 0.134           |

Notes: SBP=systolic blood pressure; DBP=diastolic blood pressure. <sup>a</sup> Model was further adjusted for antihypertensive drugs. Participants treated with other types of antihypertensive drugs were not included. Ref=reference group.

**Table S2.** Hypertensive patients' serum copper concentrations in different subgroups.

| <b>Outcome</b>                 | <b>serum copper<br/>concentration, <math>\mu\text{mol/L}</math></b> | <b><i>P</i>-value</b> |
|--------------------------------|---------------------------------------------------------------------|-----------------------|
| Non-hypertension (N=2380)      | 18.45 $\pm$ 4.61                                                    | Ref                   |
| Untreated Hypertension (N=385) | 18.67 $\pm$ 3.93                                                    | 0.376                 |
| Treated Hypertension (N=611)   | 19.53 $\pm$ 4.34                                                    | <0.001                |
| Antihypertensive use           |                                                                     |                       |
| ACE-I (N=85)                   | 19.17 $\pm$ 3.58                                                    | 0.154                 |
| ARB (N=38)                     | 18.24 $\pm$ 3.97                                                    | 0.780                 |
| BB (N=43)                      | 19.73 $\pm$ 4.51                                                    | 0.071                 |
| CCB (N=34)                     | 18.60 $\pm$ 3.44                                                    | 0.850                 |
| Thiazides (N=37)               | 21.72 $\pm$ 4.83                                                    | <0.001                |

Notes: ACE-I=angiotensin-converting enzyme inhibitor; ARB=angiotensin receptor blocker; BB=Beta-blocker; CCB=calcium channel blocker; Thiazides=thiazide and thiazide-like diuretics. *P*-values were calculated by Student's *t*-test, all group was set Non-hypertension as reference group. Ref=reference group.
